# Supplementary material
Source: PubMed Central journal article supplement (PMC4012411)
Supplement: Supp_Fig1.pdf [file Supp_Fig1.pdf]

## Supplementary Data

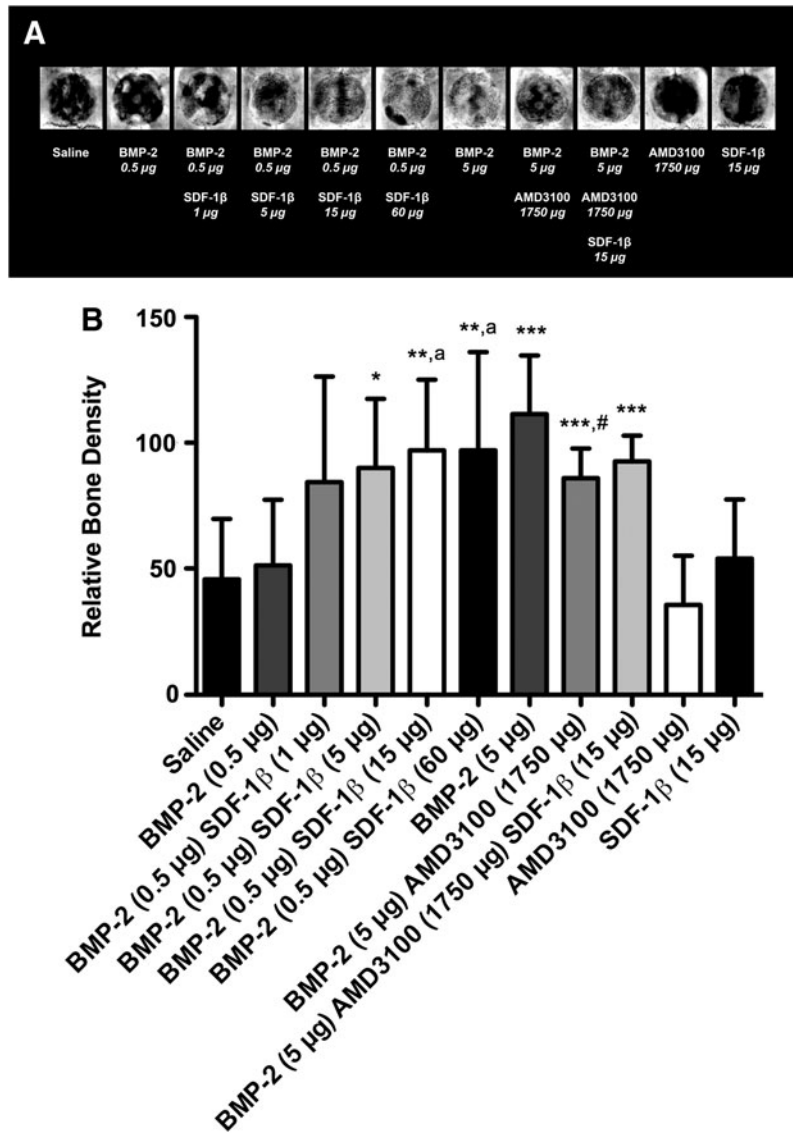

**SUPPLEMENTARY FIG. S1.** Stromal cell-derived factor-1 (SDF-1) $\beta$  enhances suboptimal bone morphogenetic protein-2 (BMP-2)-induced bone formation and is required for optimal BMP-2 signaling following local codelivery. **(A)** Representative radiographic images of critical-size rat calvarial defects at 4 weeks. **(B)** Quantitative analysis of mineralized bone formation within the 8-mm defects showed comparable bone densities between suboptimal BMP-2 and saline control. Importantly, SDF-1 $\beta$  significantly potentiated suboptimal BMP-2-induced bone formation in a dose-dependent order (1–60  $\mu$ g) [ $*p < 0.05$ ,  $**p < 0.01$ ,  $***p < 0.0001$  vs. saline control;  $^ap < 0.05$  vs. BMP-2 (0.5)], reaching comparable levels to the 10-times higher optimal BMP-2 dose. Codelivery of the specific CXC chemokine receptor 4 (CXCR4) antagonist AMD3100 with optimal BMP-2 attenuated the osteoinductive potential [ $***p < 0.0001$  vs. saline control;  $^#p < 0.05$  vs. BMP-2 (5.0)]. Neither of the control groups showed signs of significant bone formation ( $n = 10$  animals/group).
